# Supplementary material for: Genome-wide discovery, characterization, and validation of novel SSR markers in clove (Syzygium aromaticum) and their application in genetic analysis
Source: Research Square preprint supplement (doi:10.21203/rs.3.rs-8249733/v1), 2025-12-19
Supplement: Supplementary file 1 [file 9d0f76ab517a9062fcce6b78.docx]

**Genome-wide discovery, characterization, and validation of novel SSR markers in clove (Syzygium aromaticum) and their application in genetic analysis**

Muhammed Azharudheen T.P.*+, Muhammed Nissar V.A. +, Anees K., Lijo Thomas, Rabisha V.P., Jayarajan K. and T.E. Sheeja

(ICAR-Indian Institute of Spices Research, Kozhikode, Kerala-673012, India)


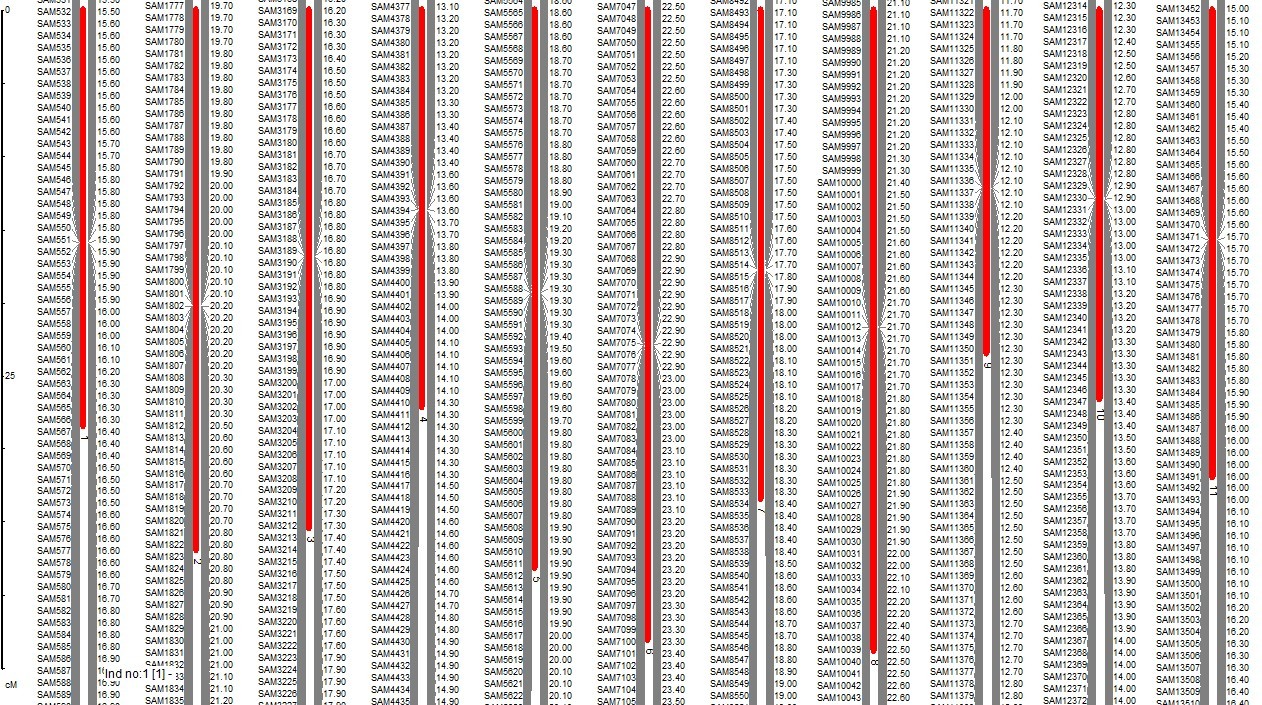


**Supplementary Figure S1**. A high density map of the genome-wide Class I and Class II SSR markers showing their physical positions on eleven chromosomes of clove.


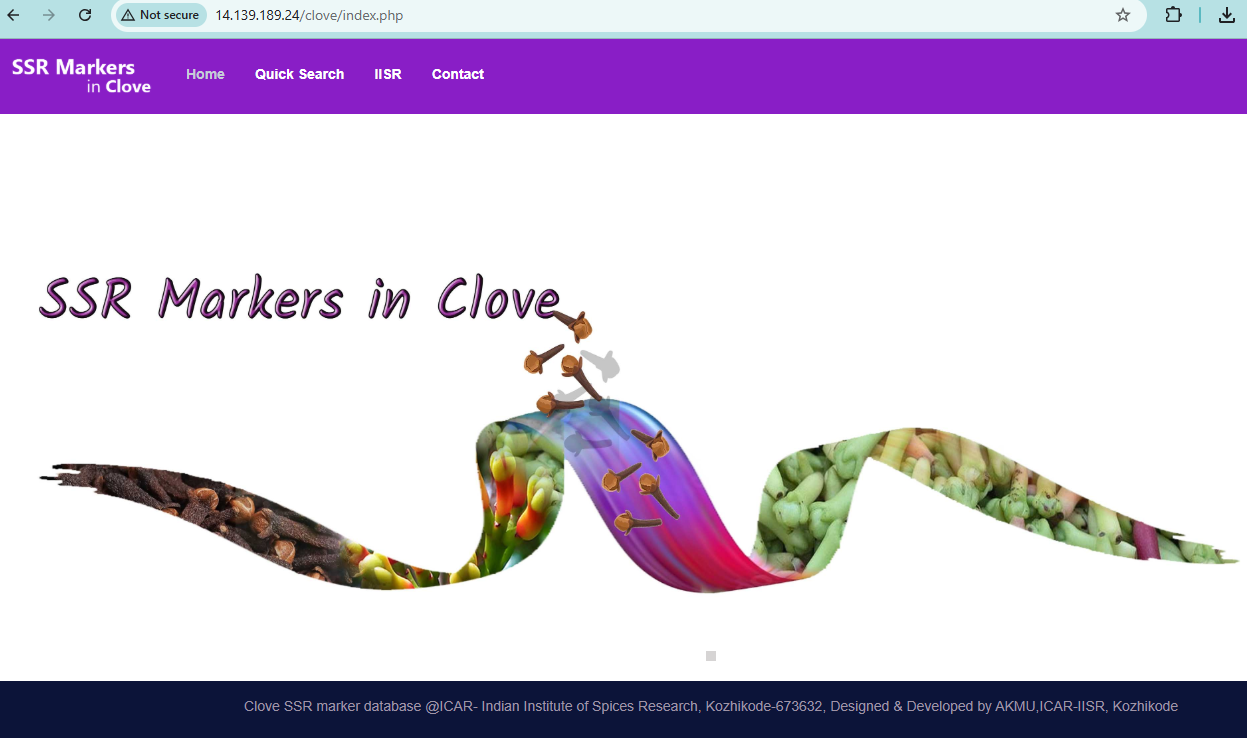


**Supplementary Figure S2**. The webpage of the SSR marker database developed in clove (<http://14.139.189.24/clove/genes.php>)


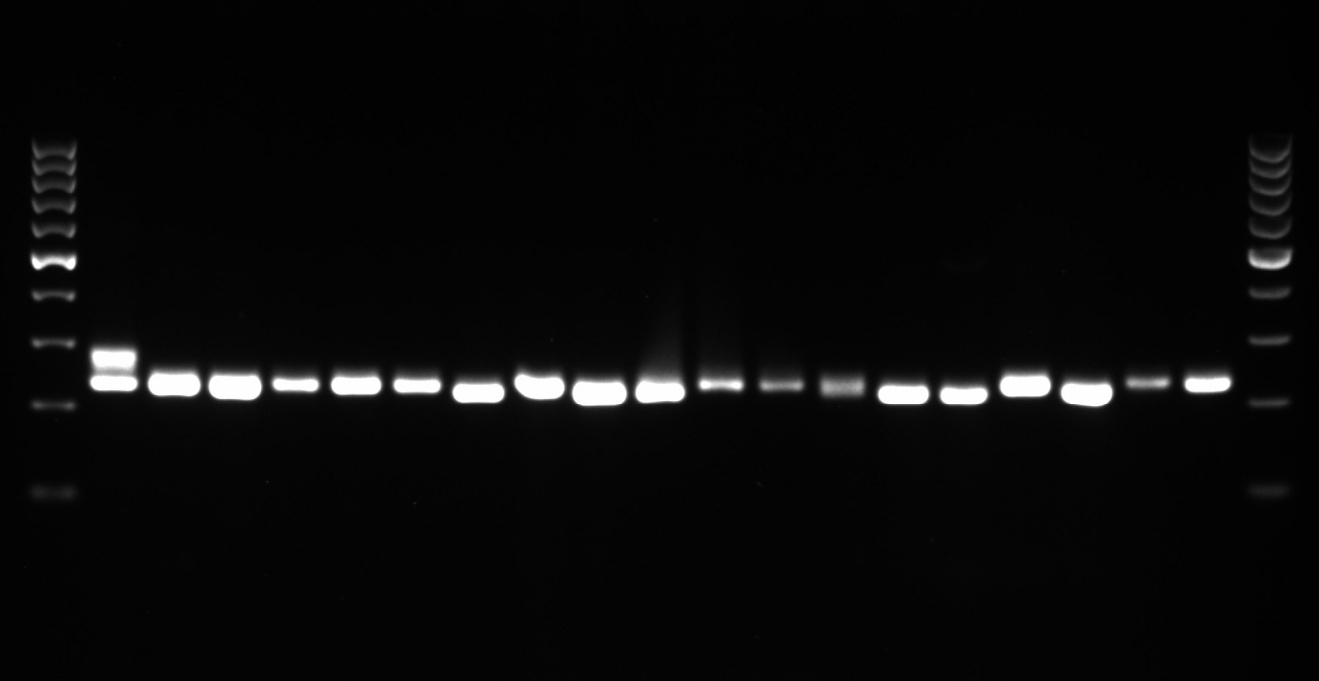


**Supplementary Fig. S3**. The Uncropped full length gel image of Fig. 4.


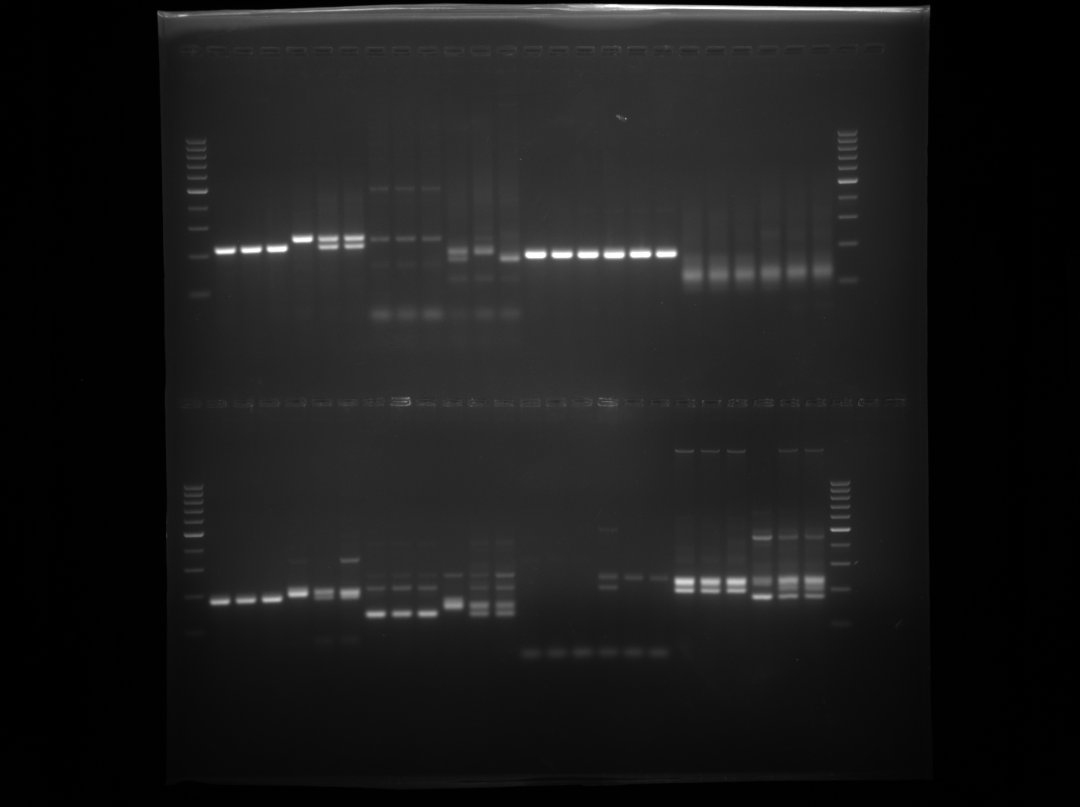


*SaM 6173*


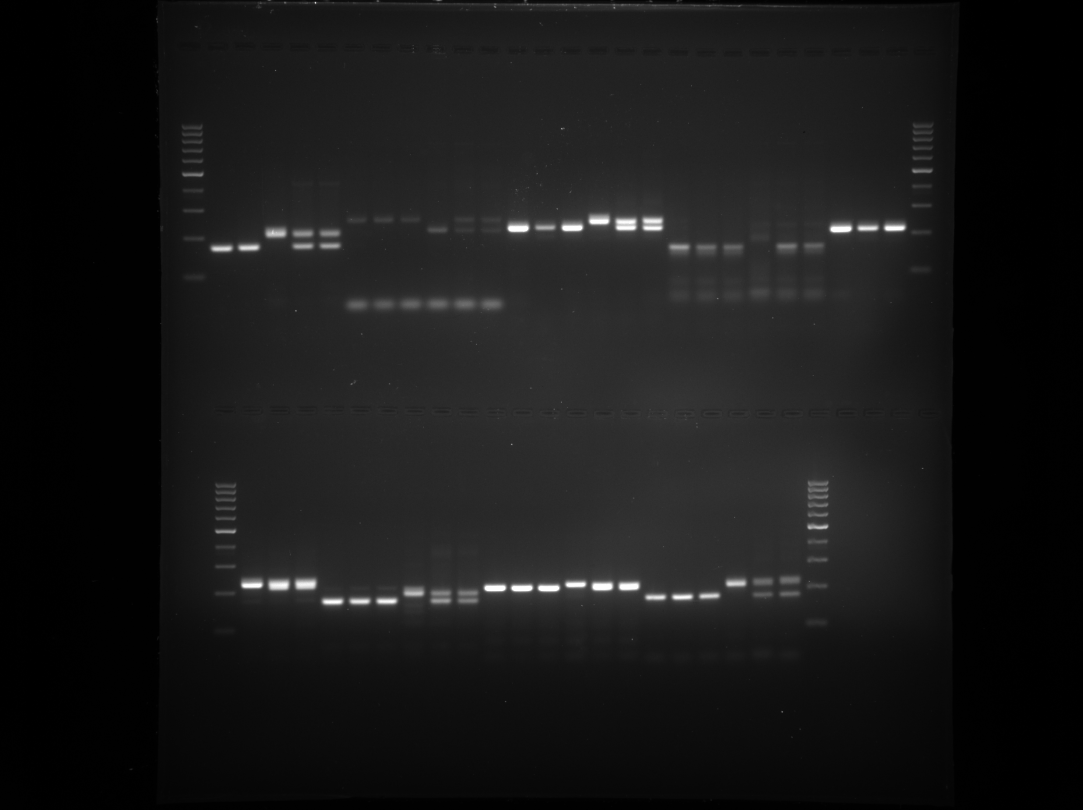


*SaM 3999*

**Supplementary Fig. S4.** The Uncropped full length gel image of Fig. 7. The cropped area for each marker is indicated with an orange box.


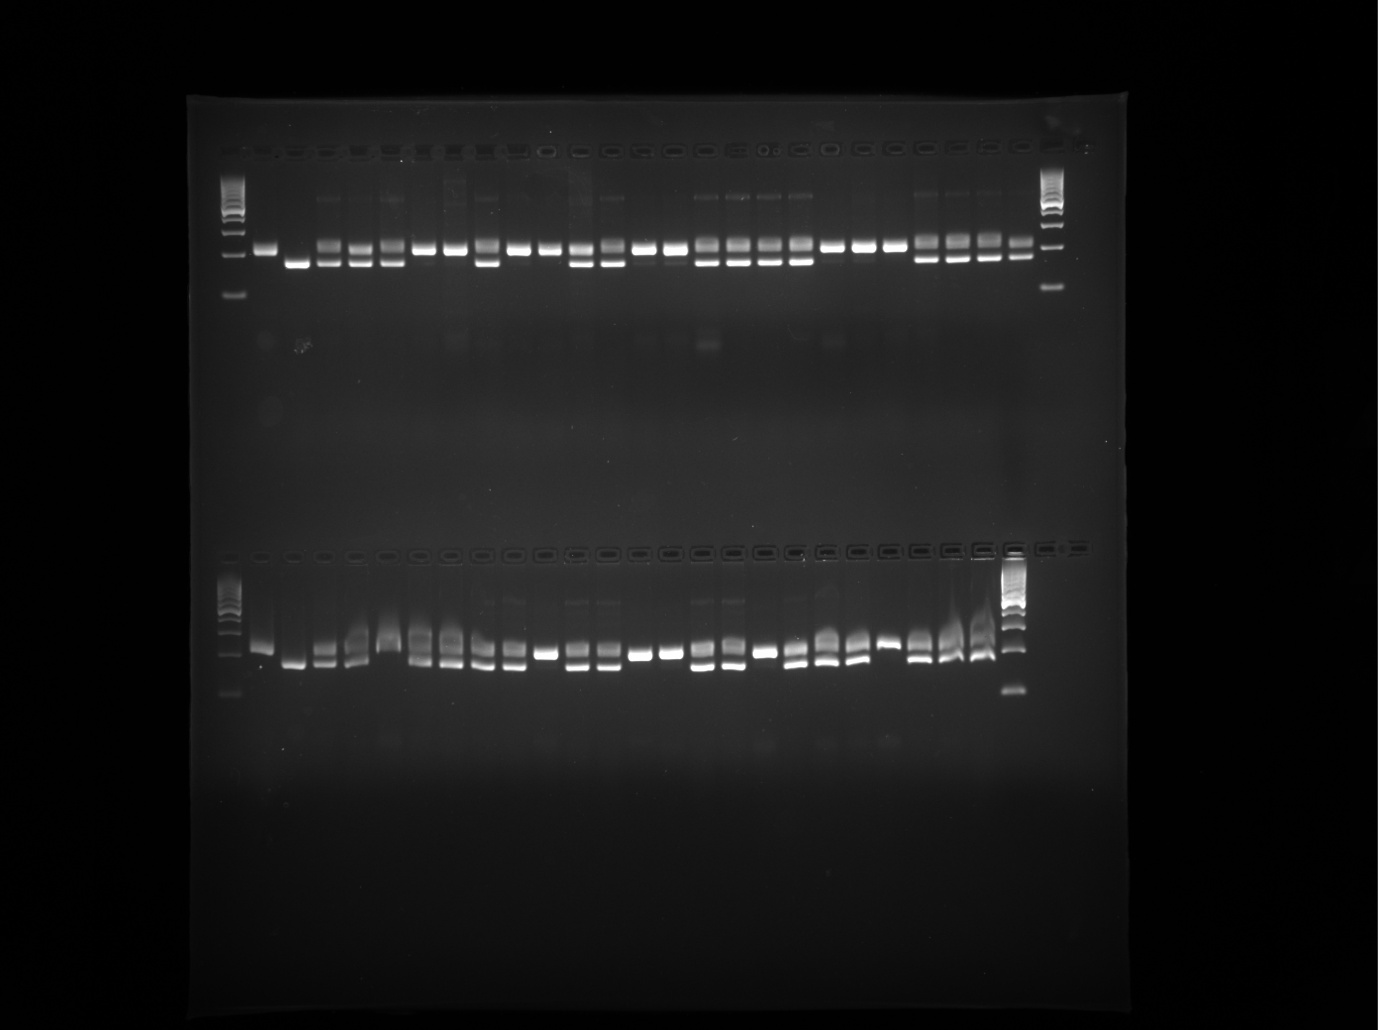


**Supplementary Fig. S5.** The Uncropped full length gel image of Fig. 8**.**


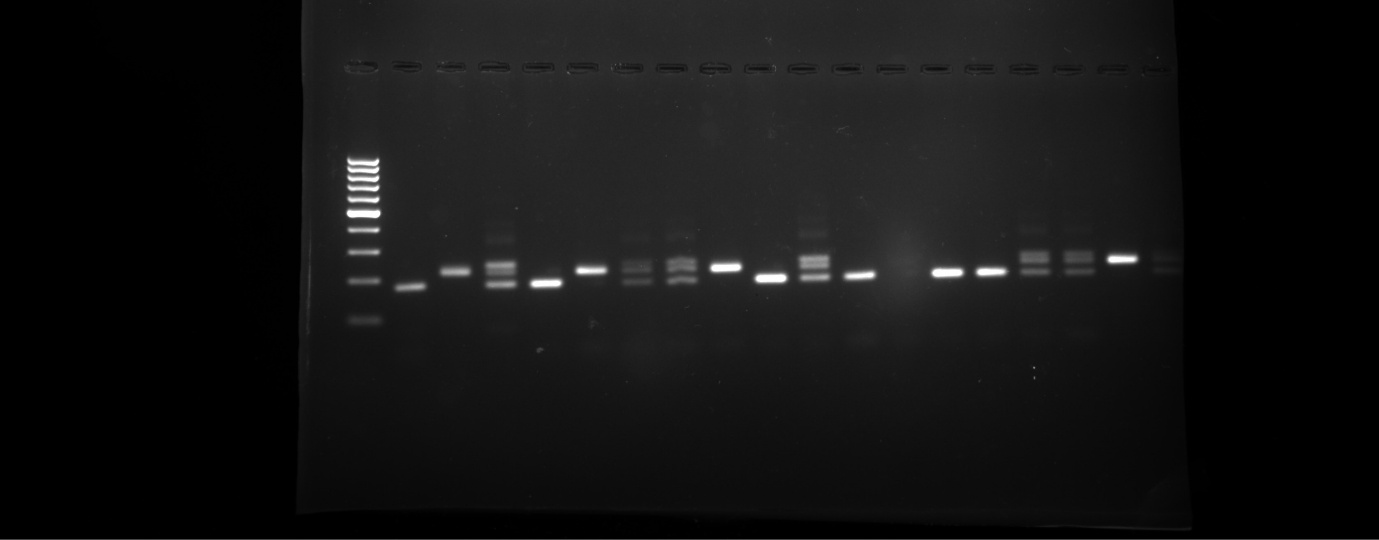

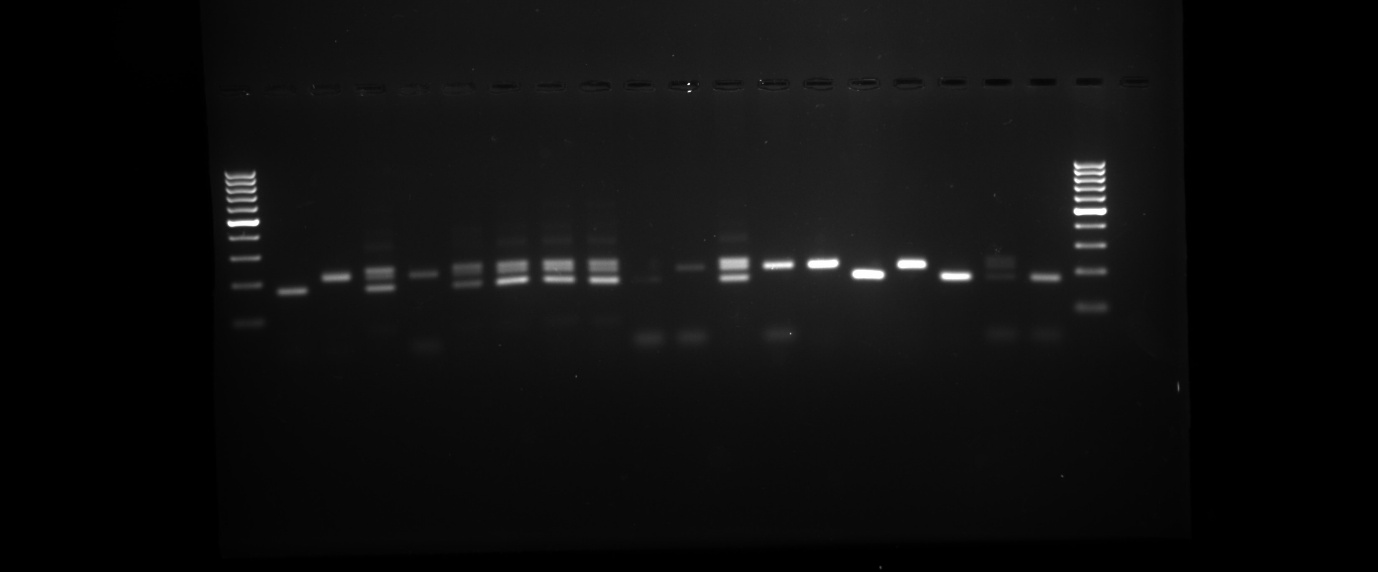


**Supplementary Fig. S6.** The Uncropped full length gel image of Fig. 9.
